# Supplementary material
Source: PubMed Central journal article supplement (PMC5446832)
Supplement: 12088_2017_642_MOESM1_ESM.pdf [file 12088_2017_642_MOESM1_ESM.pdf]

**Stress-tolerant *Viridibacillus arenosi* strain IHB B 7171 from tea rhizosphere as a potential broad-spectrum microbial inoculant**

Journal Name: Indian Journal of Microbiology

Rishu Thakur<sup>a,b</sup>, K C Sharma<sup>c</sup>, Ashu Gulati<sup>a,b</sup>, R K Sud<sup>a,b</sup> and Arvind Gulati<sup>a,b\*</sup>.

<sup>a</sup>Academy of Scientific and Innovative Research, New Delhi-110 025, India.

<sup>b</sup>CSIR-Institute of Himalayan Bioresource Technology, Post Box No. 6, Palampur-176 061, Himachal Pradesh, India.

<sup>c</sup>Krishi Vigyan Kendra, CSK Himachal Pradesh Krishi Vishvavidyalaya, Bajaura-175 125, Himachal Pradesh, India.

**\*Corresponding Author:** Arvind Gulati

Email: [gal\\_arvind@yahoo.co.in](mailto:gal_arvind@yahoo.co.in), [arvindgulati@ihbt.res.in](mailto:arvindgulati@ihbt.res.in)

[Contact number +919418130905](tel:+919418130905)

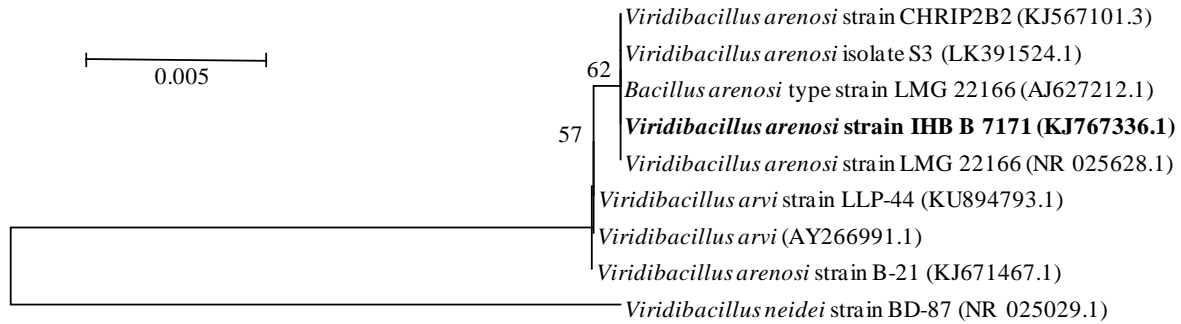

**ESM\_1** Phylogenetic-tree based on 16S rRNA gene sequence of *Viridibacillus arenosi* strain IHB B 7171 along with the closely related species using Neighbor-Joining and Kimura 2-parameter method with 1000-fold bootstrapping by MEGA6.
